# Supplementary material for: TabZIP74 Acts as a Positive Regulator in Wheat Stripe Rust Resistance and Involves Root Development by mRNA Splicing
Source: Front Plant Sci. 2019 Nov 27;10:1551. doi: 10.3389/fpls.2019.01551 (PMC6927285; doi:10.3389/fpls.2019.01551)
Supplement: Supplementary file 1 [file Table_1.xlsx]

## Sheet: Sheet1
Table S1. Protein Names and Locus IDs used in phylogenetic tree
Protein Name	Locus ID
ABF1	At1g49720
ABF2	At1g45249
AtbZIP1	At5g49450
AtbZIP10	At4g02640
AtbZIP11	At4g34590
AtbZIP12	At2g41070
AtbZIP13	At5g44080
AtbZIP14	At4g35900
AtbZIP15	At5g42910
AtbZIP16	At2g35530
AtbZIP17	At2g40950
AtbZIP18	At2g40620
AtbZIP19	At4g35040
AtbZIP2	At2g18160
AtbZIP20	At5g06950
AtbZIP21	At1g08320
AtbZIP22	At1g22070
AtbZIP23	At2g16770
AtbZIP24	At3g51960
AtbZIP25	At3g54620
AtbZIP26	At5g06960
AtbZIP27	At2g17770
AtbZIP28	At3g10800
AtbZIP29	At4g38900
AtbZIP3	At5g15830
AtbZIP30	At2g21230
AtbZIP31	At2g13150
AtbZIP32	At2g12980
AtbZIP33	At2g12900
AtbZIP34	At2g42380
AtbZIP37	At4g34000
AtbZIP38	At3g19290
AtbZIP39	At2g36270
AtbZIP4	At1g59530
AtbZIP40	At1g03970
AtbZIP41	At4g36730
AtbZIP42	At3g30530
AtbZIP43	At5g38800
AtbZIP44	At1g75390
AtbZIP45	At3g12250
AtbZIP46	At1g68640
AtbZIP47	At5g65210
AtbZIP48	At2g04038
AtbZIP49	At3g56660
AtbZIP5	At3g49760
AtbZIP50	At1g77920
AtbZIP51	At1g43700
AtbZIP52	At1g06850
AtbZIP53	At3g62420
AtbZIP54	At4g01120
AtbZIP55	At2g46270
AtbZIP56	At5g11260
AtbZIP57	At5g10030
AtbZIP58	At1g13600
AtbZIP59	At2g31370
AtbZIP6	At2g22850
AtbZIP60	At1g42990
AtbZIP61	At3g58120
AtbZIP62	At1g19490
AtbZIP63	At5g28770
AtbZIP66	At3g56850
AtbZIP67	At3g44460
AtbZIP68	At1g32150
AtbZIP69	At1g06070
AtbZIP7	At4g37730
AtbZIP70	At5g60830
AtbZIP71	At2g24340
AtbZIP72	At5g07160
AtbZIP73	At2g13130
AtbZIP74	At2g21235
AtbZIP8	At1g68880
AtbZIP9	At5g24800
HYH	At3g17610
OsbZIP39	Os05g0411300
OsbZIP60	Os07g0644100
OsbZIP74	Os06g0622700
ZmbZIP17	LOC100284034
ZmbZIP28	LOC100281685
ZmbZIP60	LOC100280864
NtbZIP60	LOC107761889
